# Supplementary material
Source: PubMed Central journal article supplement (PMC7560814)
Supplement: rccm.201908-1576OC_huang_data_supplement.pdf [file rccm.201908-1576OC_huang_data_supplement.pdf]

## Supplementary Appendix

### Table of Contents

|                             |    |
|-----------------------------|----|
| List of Investigators ..... | 2  |
| Methods .....               | 4  |
| Figures.....                | 9  |
| Tables .....                | 12 |
| References .....            | 25 |

## List of Investigators

1. Chuan-Chin Huang, Sc.D., Brigham and Women's Hospital, Division of Global Health Equity, 75 Francis Street, Boston, Massachusetts 02115, United States; Department of Global Health and Social Medicine, Harvard Medical School, 641 Huntington Avenue, Boston, Massachusetts 02115, United States.
2. Mercedes C. Becerra, Sc.D., Department of Global Health and Social Medicine, Harvard Medical School, 641 Huntington Avenue, Boston, Massachusetts 02115, United States.
3. Roger Calderon, M.S., Partners in Health - Socios En Salud Sucursal, Av. Chimpu Ocllo # 998 Urb. Residencial Lucyana, Carabayllo, Lima, Peru.
4. Carmen Contreras, M.P.H., Partners in Health - Socios En Salud Sucursal, Av. Chimpu Ocllo # 998 Urb. Residencial Lucyana, Carabayllo, Lima, Peru.
5. Jerome Galea, Ph.D., School of Social Work, University of South Florida, 13301 Bruce B Downs Blvd, MHC 1416 A, Tampa, Florida 33612, USA
6. Louis Grandjean, Ph.D., Wellcome Centre for Clinical Tropical Medicine, Imperial College London, London WC1H 9JJ, United Kingdom ; Universidad Peruana Cayetano Heredia, Av. Honorio Delgado 430, Urb Ingenieria, Lima, Peru; TB Centre, London School of Hygiene & Tropical Medicine, Keppel Street, London WC1E 7HT, United Kingdom.
7. Leonid Lecca, M.D., Partners in Health - Socios En Salud Sucursal, Av. Chimpu Ocllo # 998 Urb. Residencial Lucyana, Carabayllo, Lima, Peru.
8. Rosa Yataco, Partners in Health - Socios En Salud Sucursal, Av. Chimpu Ocllo # 998 Urb. Residencial Lucyana, Carabayllo, Lima, Peru.

9. Zibiao Zhang, M.S., Brigham and Women's Hospital, Division of Global Health Equity, 75 Francis Street, Boston, Massachusetts 02115, United States.
10. Megan Murray, M.D., Sc.D., Harvard Medical School, Department of Global Health and Social Medicine, Boston, Massachusetts, United States and Brigham and Women's Hospital, Division of Global Health Equity, Boston, Massachusetts, United States

## **Methods**

### **Recruitment**

This study was conducted in Lima in 106 district health centers that provide care to a population of approximately three million residents. We enrolled all patients who were newly diagnosed with pulmonary tuberculosis and over 15 years of age. The diagnosis was performed by a health center clinician on the basis of sputum smear microscopy or chest radiography. We collected an additional sputum sample from consenting participants which we sent for repeat sputum smear microscopy, mycobacterial culture, and drug sensitivity testing. We confirmed the microbiological status of their pulmonary tuberculosis disease with either a positive sputum smear or mycobacterial culture. We requested permission to visit each patient's household and recruit his or her household contacts (household contacts) into a prospective cohort study. Study workers aimed to enroll all household members within one week of the diagnosis of the index case.

### **Baseline assessment of index patients**

We collected the following data from index patients at the time of enrollment: age, gender, occupation, symptoms of tuberculosis, duration of symptoms, history of tuberculosis disease, alcohol, intravenous drug, recreational drug, and tobacco history, and comorbidities including HIV and diabetes mellitus. Patients who did not know their HIV status had blood drawn for HIV and CD4 count. Signs associated with tuberculosis disease, height, and weight were recorded. Index patients also underwent HIV testing and were evaluated with a chest radiograph. The time to treatment was measured as the number of days the patient reported coughing prior to diagnosis.

### **Bacteriological cultures and drug susceptibility testing**

Sputum samples were tested for the presence of acid-fast bacilli by Ziehl-Neelsen staining and cultured by inoculation in two tubes containing Löwenstein-Jensen or Ogawa medium. Indirect susceptibility testing to isoniazid, Rifampicin (RIF), Ethambutol (EMB) and Streptomycin (STR) was conducted by the Löwenstein-Jensen Proportion Method, using the following drug concentrations: isoniazid (0.2 and 1.0 µg/ml), RIF (40.0 µg/ml), EMB (2.0 µg/ml), and STR (4.0 µg/ml). Susceptibility to Pyrazinamide (PZA) (100 µg/ml) was tested using the Wayne method. DNA from each mycobacterial culture was extracted and genotyped by 24-loci mycobacterial interspersed repetitive units-variable-number tandem repeats (MIRU-VNTR) using standard methods (1).

### **Whole genome sequencing on culture positive isolates**

Mtb strains were sequenced on an Illumina HiSeq 4000 in paired-end mode with a read-length of 100-150 base-pairs (bps) and at least a 50-fold coverage (2). The paired-end raw sequence data were mapped to the H37Rv reference genome using the BWA mem algorithm (3). We used SAMtools (default settings) and pilon to identify the single nucleotide polymorphisms (SNPs) across the whole genome using a coverage-based approach (4, 5). We assigned a call as missing if the valid depth of coverage at a specific site is less than 10 reads, if the mean read mapping

quality at the site does not reach 7, or if none of the alternative alleles account for at least 90% of the valid coverage.

### **Follow-up of index patients**

Index patients received directly observed therapy at their district health clinics, as specified in the Peruvian National Tuberculosis Control Program (NTP) guidelines for drug-sensitive and drug-resistant tuberculosis. Patients with drug-sensitive tuberculosis received a standard 6-month course with a 2-month “intensification phase” of isoniazid, RIF, PZA, and EMB followed by a 4-month “consolidation phase” of isoniazid and RIF alone. Patients with MDR-tuberculosis, received treatment according to NTP guidelines. Since results for routine drug resistance testing were often not available for two to three months after initial diagnosis, patients who were not previously suspected of having MDR-tuberculosis, were started on a first-line drug regimen until MDR-tuberculosis, was confirmed.

### **Isoniazid preventive therapy for household contacts**

The 2006 Peruvian National tuberculosis Program recommended that household contacts 19 years old or younger and those who had a specified comorbidity should receive six months of isoniazid preventive therapy while those with HIV should receive 12 months (6). Children aged 19 and under were offered isoniazid preventive therapy at the time index patients were diagnosed, regardless of tuberculin skin test (TST) status. Health care providers often chose to discontinue isoniazid preventive therapy in household contacts if the index patient was subsequently diagnosed with MDR-tuberculosis, but some MDR-exposed household contacts received a full course of isoniazid preventive therapy. We used medical records from participating hospitals and health clinics to determine the duration of isoniazid preventive therapy.

### **Enrollment of household contacts**

At the time of the enrollment of household contacts, study workers collected the following data: whether isoniazid preventive therapy had been initiated, age, gender, relationship to index patient, housing information including number of rooms, building material, type of flooring, education, residential district, history of incarceration, occupation, alcohol, cigarette and illicit drug intake, general health history including previous history of tuberculosis, BCG vaccination, co-morbidities, BMI medications taken. Participants were assessed for symptoms associated with tuberculosis disease including cough, night sweats, weight loss, and fever. Those with symptoms were referred to their local health clinic for chest radiography and clinical evaluation for active tuberculosis disease. Household members with no known history of active tuberculosis disease or previously documented infection received a TST, and those with unknown HIV status were tested for HIV.

## **Follow-up of household contacts**

Participants were revisited in their household at two, six, and 12 months and were asked whether they had been diagnosed with tuberculosis or if they had had symptoms of active disease. Those who reported symptoms were referred to their local health center for further clinical evaluation including a chest radiograph and sputum smear. Participants who tested negative at the initial study visit and who had not developed active tuberculosis disease at the time of the follow-up visit underwent repeat TST and clinical evaluation at six and 12 months. We used medical records from participating hospitals and health clinics to determine the duration of isoniazid preventive therapy.

## **Data categorization**

We considered household contacts to have received isoniazid preventive therapy in response to the exposure to the index patient if isoniazid was initiated within three months of that patient's diagnosis. We categorized participants according to their alcohol intake as nondrinkers if they reported having consumed no alcoholic drinks per day, light drinkers if they reported drinking <40 grams or <3 alcoholic drinks per day, and heavy drinkers if they reported drinking 40 grams or more of alcohol or three or more drinks per day. A large proportion of smokers reported smoking only a single cigarette per day. We classified people as nonsmokers if they reported no cigarette smoking, as light smokers if they reported smoking one cigarette per day, and as heavy smokers if they reported smoking more than one cigarette per day. We defined nutritional status for children based on the WHO body mass index (BMI) z-score tables (7). We assigned people with BMI z-scores of less than two as underweight and those greater than two as overweight.

We created a continuous variable to capture household socioeconomic status (SES) by including variables on housing quality, water supply, and sanitation in a principal component analysis (PCA). PCA is a data reduction statistical technique that extracts a set of uncorrelated 'principal components' from a set of correlated variables, where each principal component is a weighted linear combination of the original variables. The continuous SES score was categorized into tertiles corresponding to relative "low," "middle," and "upper" SES. We categorized household average education into "low," "middle," and "upper" levels.

## **Outcome definition**

We identified incident tuberculosis among household contacts during scheduled household visits and from a systematic review of tuberculosis registries at the participating health clinics to ensure we obtained all the incident tuberculosis among household contacts during the one-year follow-up. We considered household contacts to have co-prevalent tuberculosis if they were diagnosed within two weeks of the diagnosis of the index case. If household contacts were diagnosed between two weeks and 15 months after diagnosis of the index case, we considered them "secondary" cases. Diagnosis of adult secondary tuberculosis followed the same criteria as outlined above for index cases. We defined secondary tuberculosis disease among contacts younger than 18 years of age according to the consensus guidelines for classifying tuberculosis disease in children (8).

## **Analyses**

We included in our analysis only household contacts under 19 because older contacts were only offered isoniazid preventive therapy if they had comorbidities that substantially increased their risk of tuberculosis disease. We used a Cox frailty proportional hazards model to evaluate risk factors for incident tuberculosis disease, accounting for clustering within households (9). We first performed a univariate analysis to examine the effect of isoniazid preventive therapy on tuberculosis incidence, followed by a multivariate model in which we adjusted for the age of the index case and the age, SES and tuberculosis history of the household contact. To evaluate whether the effect of isoniazid preventive therapy on tuberculosis incidence varied by resistance profile of the index case, we added a variable representing isoniazid resistance in the index case and an interaction term for isoniazid-resistance and isoniazid preventive therapy. Because the spectrum of isoniazid resistance-causing mutations that lead to isoniazid mono-resistance may differ from those that lead to MDR-tuberculosis, we classified strains as sensitive, mono-isoniazid-resistant, or MDR-tuberculosis, (resistant to both isoniazid and RIF). Previous studies have shown that the efficacy of isoniazid preventive therapy treatment is reduced if the treatment is ended within three months (10). We therefore repeated these analyses stratifying by a dichotomous variable that captured treatment for more or less than three months. We also considered the possibility that household contacts  $\leq 5$  years of age would be more likely to acquire tuberculosis at home than in the community compared to older contacts and we thus conducted sensitivity analyses restricted to this subgroup.

To determine whether the effect of isoniazid preventive therapy on disease in the household contacts was a function of the mean inhibitory concentrations (MICs) of the infecting organism, we repeated these analyses for the subset of household contacts exposed to index cases for whom quantitative isoniazid-resistance was available.

### **Verifying our finding with an independent dataset**

We conducted a similar analysis using publically available data from an independent dataset collected from a prospective cohort study in South Lima and Callao, Peru between 2010 and 2013, posted by Grandjean et al. (11). This study enrolled 1,055 household contacts of 213 MDR-tuberculosis, index cases and 2,362 household contacts of 487 drug-susceptible index cases and measured incident tuberculosis over 2-years of follow-up. Drug susceptibility testing for isoniazid and RIF was performed for all index cases' samples using microscopic observation drug susceptibility assays in regional laboratories and results were confirmed in the national reference laboratory using proportions methods (12). The investigators note that isoniazid preventive therapy was discontinued in this group after MDR-tuberculosis, index cases were confirmed but data on the duration of isoniazid preventive therapy were not available.

We used a Cox frailty proportional hazards model to evaluate the association between isoniazid preventive therapy and incident tuberculosis infection in individuals aged 19 and under, accounting for clustering within each matched set. We first performed univariate analysis, followed by a multivariate model adjusted for household contacts' age, SES, and previous tuberculosis history. We then added a dichotomous variable for the drug resistance status (MDR

or sensitive) in the index case, as well as interaction terms for the resistance profile and isoniazid preventive therapy to evaluate whether the effect of isoniazid preventive therapy on tuberculosis incidence varied by the resistance profile of index cases.



Figure S1. Flow diagram of household contacts of household contacts of index tuberculosis patients

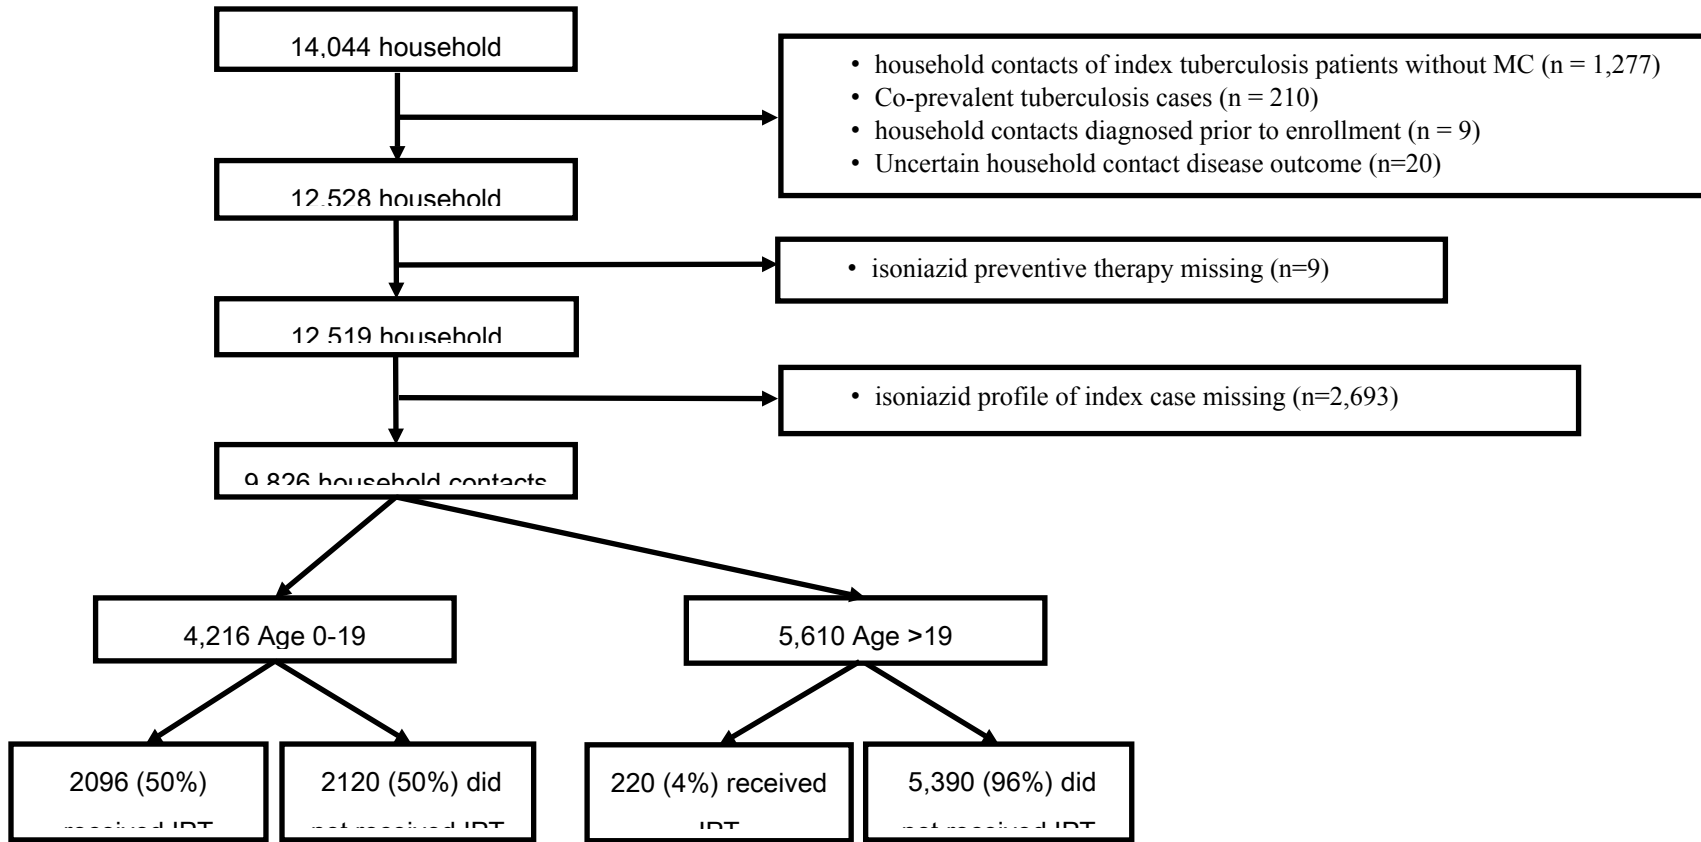

Figure S2. Duration of isoniazid prevention therapy by isoniazid resistant profile pattern of tuberculosis index cases

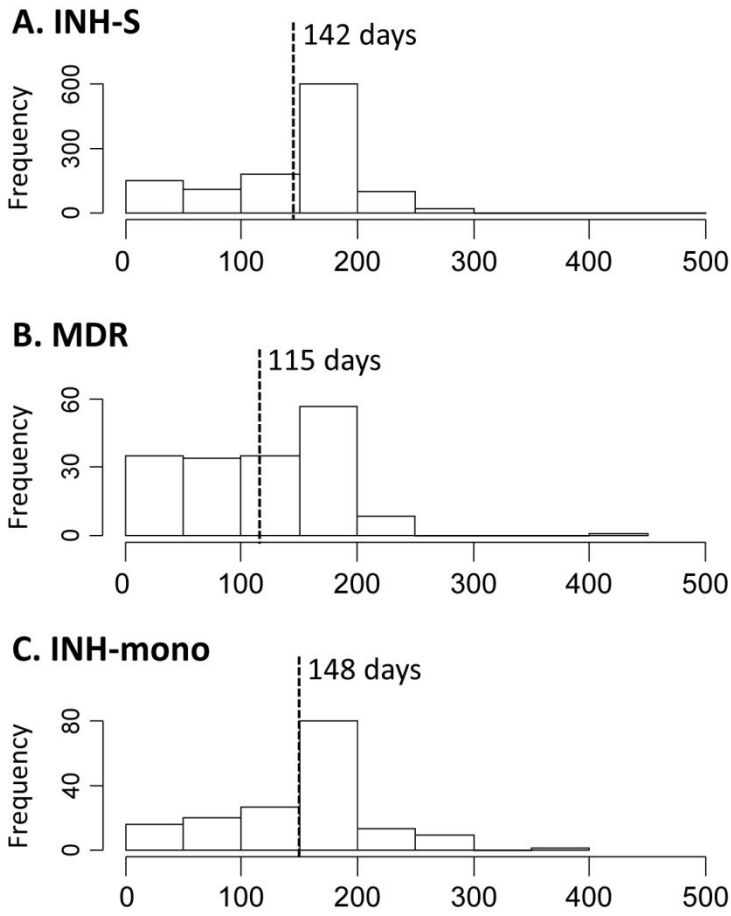

Figure S3. Genetic distance of secondary cases and their index cases

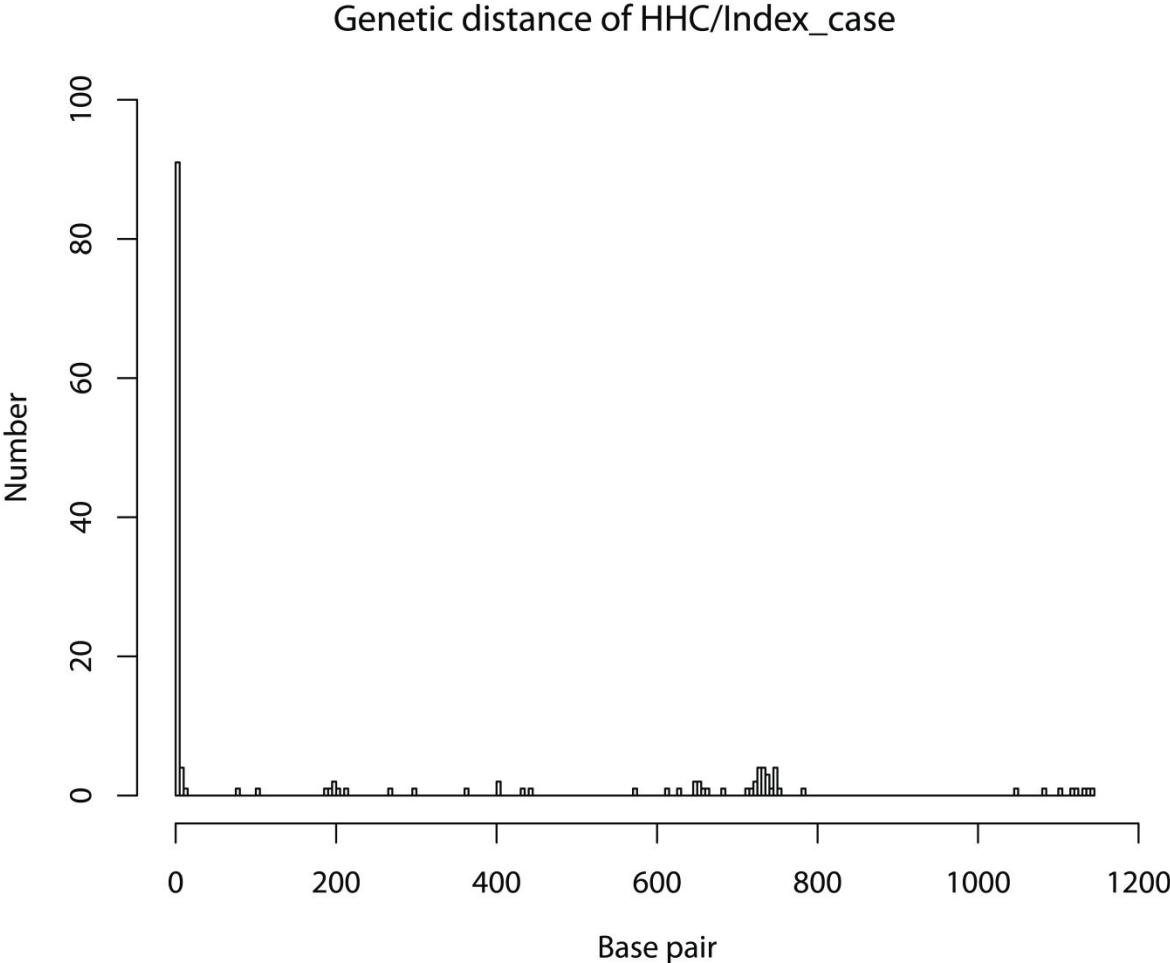

## Tables

Table S1. Baseline characteristics of household contacts  $\leq 19$  years old and exposed to an index case with drug-sensitive tuberculosis, stratified by isoniazid prevention therapy.

| Characteristic                            | No isoniazid |      | Isoniazid  |     | p-value* |
|-------------------------------------------|--------------|------|------------|-----|----------|
|                                           | preventive   |      | preventive |     |          |
|                                           | therapy      |      | therapy    |     |          |
|                                           | N            | %    | N          | %   |          |
| Age in years (N=3,164)                    |              |      |            |     | <0.01    |
| 0 to 5                                    | 484          | 32%  | 659        | 40% |          |
| 6 to 10                                   | 324          | 21%  | 417        | 26% |          |
| 11 to 15                                  | 349          | 23%  | 354        | 22% |          |
| 16 to 19                                  | 377          | 25%  | 200        | 12% |          |
| Gender (N=3,164)                          |              |      |            |     | 0.33     |
| Female                                    | 786          | 51%  | 806        | 49% |          |
| Male                                      | 748          | 49%  | 824        | 51% |          |
| HIV seropositive (N=3,128)                |              |      |            |     | 0.12     |
| No                                        | 1,508        | 100% | 1,616      | 100 |          |
| Yes                                       | 4            | 0%   | 0          | 0%  |          |
| Diabetes Mellitus (N=3,157)               |              |      |            |     | 0.98     |
| No                                        | 1,529        | 100% | 1,627      | 100 |          |
| Yes                                       | 1            | 0%   | 0          | 0%  |          |
| BCG scars (N=3,164)                       |              |      |            |     | 0.52     |
| 0                                         | 299          | 19%  | 294        | 18% |          |
| 1                                         | 1,197        | 78%  | 1,299      | 80% |          |
| $\geq 2$                                  | 38           | 2%   | 37         | 2%  |          |
| Smoking status (N=3,159)                  |              |      |            |     | <0.01    |
| Non-smoker                                | 1,494        | 98%  | 1,621      | 100 |          |
| 1 cigarette per day                       | 19           | 1%   | 5          | 0%  |          |
| >1 cigarette per day                      | 17           | 1%   | 3          | 0%  |          |
| Alcohol use (N=3,151)                     |              |      |            |     | <0.01    |
| Non-drinker                               | 1,384        | 91%  | 1,557      | 96% |          |
| 0 to <3 drinks per day                    | 111          | 7%   | 60         | 4%  |          |
| $\geq 3$ drinks per day                   | 31           | 2%   | 8          | 0%  |          |
| Nutritional status <sup>†</sup> (N=3,132) |              |      |            |     | 0.07     |
| Normal weight                             | 1,269        | 84%  | 1,299      | 81% |          |
| Underweight                               | 31           | 2%   | 46         | 3%  |          |
| Overweight                                | 219          | 14%  | 268        | 17% |          |
| Use of public transportation (N=3,105)    |              |      |            |     | 0.12     |
| Non-user                                  | 530          | 35%  | 629        | 40% |          |

|                                             |       |     |       |      |       |
|---------------------------------------------|-------|-----|-------|------|-------|
| 1 to 3 days per week                        | 510   | 34% | 484   | 30%  |       |
| 4 to 7 days per week                        | 477   | 31% | 475   | 30%  |       |
| Socioeconomic status <sup>‡</sup> (N=3,099) |       |     |       |      | 0.19  |
| Low                                         | 593   | 40% | 617   | 39%  |       |
| Middle                                      | 675   | 45% | 694   | 43%  |       |
| High                                        | 233   | 16% | 287   | 18%  |       |
| Tuberculosis infected at baseline (N=3,056) |       |     |       |      | 0.72  |
| No                                          | 1,060 | 72% | 1,154 | 73%  |       |
| Yes                                         | 410   | 28% | 432   | 27%  |       |
| TB history (N=3,164)                        |       |     |       |      | <0.01 |
| No                                          | 1,478 | 96% | 1,624 | 100% |       |
| Yes                                         | 56    | 4%  | 6     | 0%   |       |
| Employment (N=3,162)                        |       |     |       |      | <0.01 |
| No                                          | 1,373 | 90% | 1,544 | 73%  |       |
| Yes                                         | 160   | 10% | 85    | 27%  |       |
| Being a student (N=3,162)                   |       |     |       |      | <0.01 |
| No                                          | 591   | 39% | 546   | 34%  |       |
| Yes                                         | 943   | 61% | 1,082 | 66%  |       |
| Index-case age in years (N=3,164)           |       |     |       |      | <0.01 |
| 16-30                                       | 915   | 60% | 942   | 58%  |       |
| 31 to 45                                    | 307   | 20% | 439   | 27%  |       |
| 46 to 60                                    | 179   | 12% | 118   | 7%   |       |
| >60                                         | 133   | 9%  | 131   | 8%   |       |
| Index-case sex (N=3,164)                    |       |     |       |      | <0.01 |
| Female                                      | 599   | 39% | 838   | 51%  |       |
| Male                                        | 935   | 61% | 792   | 49%  |       |
| Index-case smoking status (N=3,110)         |       |     |       |      | 0.53  |
| None or light smoker                        | 1,486 | 99% | 1,588 | 99%  |       |
| Heavy smoker                                | 15    | 1%  | 21    | 1%   |       |
| Index-case drinking status (N=3,035)        |       |     |       |      | 0.46  |
| None or light drinker                       | 1,291 | 89% | 1,429 | 90%  |       |
| Light drinker                               | 157   | 11% | 158   | 10%  |       |
| Index-case employment (N=3,150)             |       |     |       |      | 0.17  |
| No                                          | 1,000 | 66% | 1,104 | 68%  |       |
| Yes                                         | 525   | 34% | 521   | 32%  |       |
| Index-case Marijuana use (N=3,159)          |       |     |       |      | <0.01 |
| No                                          | 1,213 | 79% | 1,430 | 88%  |       |
| Yes                                         | 316   | 21% | 200   | 12%  |       |
| Index-case Cocaine (N=3,159)                |       |     |       |      | <0.01 |
| No                                          | 1,275 | 83% | 1,485 | 91%  |       |
| Yes                                         | 254   | 17% | 145   | 9%   |       |
| Household incarceration (N=3,164)           |       |     |       |      | <0.01 |
| No                                          | 1,343 | 88% | 1,511 | 93%  |       |
| Yes                                         | 191   | 12% | 119   | 7%   |       |
| Household education (N=3,164)               |       |     |       |      | <0.01 |

|                              |     |     |     |     |       |
|------------------------------|-----|-----|-----|-----|-------|
| Low                          | 361 | 24% | 302 | 19% |       |
| Medium                       | 887 | 58% | 927 | 57% |       |
| High                         | 286 | 19% | 401 | 25% |       |
| <hr/>                        |     |     |     |     |       |
| Household district (N=3,164) |     |     |     |     | <0.01 |
| Cercado de Lima              | 180 | 12% | 96  | 6%  |       |
| Comas                        | 97  | 6%  | 117 | 7%  |       |
| El Agustino                  | 193 | 13% | 36  | 2%  |       |
| La Victoria                  | 193 | 13% | 153 | 9%  |       |
| Los Olivos                   | 144 | 9%  | 188 | 12% |       |
| Rimac                        | 60  | 4%  | 250 | 15% |       |
| San Martin de Porres         | 261 | 17% | 452 | 28% |       |
| Santa Anita                  | 115 | 7%  | 71  | 4%  |       |
| Others                       | 291 | 19% | 267 | 16% |       |

\* Compared the two groups used a  $\chi^2$  test

† Nutritional status was defined by the WHO body mass index z-score tables

‡ Socioeconomic status was defined using a principal component analysis based on housing quality,  
Abbreviation: N: number; MDR: multi-drug resistant

Table S2. Baseline characteristics of household contacts  $\leq 19$  years old and exposed to an index case with MDR tuberculosis, stratified by isoniazid prevention therapy.

| Characteristic                            | No isoniazid |      | Isoniazid  |      | p-value <sup>a</sup> |
|-------------------------------------------|--------------|------|------------|------|----------------------|
|                                           | preventive   |      | preventive |      |                      |
|                                           | therapy      |      | therapy    |      |                      |
|                                           | N            | %    | N          | %    |                      |
| Age in years (N=666)                      |              |      |            |      | <0.01                |
| 0 to 5                                    | 124          | 31%  | 118        | 45%  |                      |
| 6 to 10                                   | 83           | 21%  | 67         | 25%  |                      |
| 11 to 15                                  | 101          | 25%  | 51         | 19%  |                      |
| 16 to 19                                  | 93           | 23%  | 29         | 11%  |                      |
| Gender (N=666)                            |              |      |            |      | 0.07                 |
| Female                                    | 215          | 54%  | 122        | 46%  |                      |
| Male                                      | 186          | 46%  | 143        | 54%  |                      |
| HIV seropositive (N=658)                  |              |      |            |      | NA                   |
| No                                        | 398          | 100% | 260        | 100% |                      |
| Yes                                       | 0            | 0%   | 0          | 0%   |                      |
| Diabetes Mellitus (N=663)                 |              |      |            |      | 1                    |
| No                                        | 399          | 100% | 262        | 100% |                      |
| Yes                                       | 1            | 0%   | 1          | 0%   |                      |
| BCG scars (N=666)                         |              |      |            |      | 0.54                 |
| 0                                         | 88           | 22%  | 53         | 20%  |                      |
| 1                                         | 301          | 75%  | 207        | 78%  |                      |
| $\geq 2$                                  | 12           | 3%   | 5          | 2%   |                      |
| Smoking status (N=666)                    |              |      |            |      | 0.19                 |
| Non-smoker                                | 396          | 99%  | 265        | 100% |                      |
| 1 cigarette per day                       | 2            | 0%   | 0          | 0%   |                      |
| >1 cigarette per day                      | 3            | 1%   | 0          | 0%   |                      |
| Alcohol use (N=661)                       |              |      |            |      | <0.01                |
| Non-drinker                               | 366          | 92%  | 259        | 98%  |                      |
| 0 to <3 drinks per day                    | 24           | 6%   | 4          | 2%   |                      |
| $\geq 3$ drinks per day                   | 7            | 2%   | 1          | 0%   |                      |
| Nutritional status <sup>b</sup> (N=658)   |              |      |            |      | 0.35                 |
| Normal weight                             | 331          | 83%  | 214        | 83%  |                      |
| Underweight                               | 7            | 2%   | 9          | 3%   |                      |
| Overweight                                | 61           | 15%  | 36         | 14%  |                      |
| Use of public transportation (N=643)      |              |      |            |      | 0.49                 |
| Non-user                                  | 145          | 37%  | 92         | 37%  |                      |
| 1 to 3 days per week                      | 129          | 33%  | 89         | 36%  |                      |
| 4 to 7 days per week                      | 122          | 31%  | 66         | 27%  |                      |
| Socioeconomic status <sup>c</sup> (N=664) |              |      |            |      | 0.09                 |
| Low                                       | 149          | 37%  | 119        | 45%  |                      |

|                                           |     |     |     |      |       |
|-------------------------------------------|-----|-----|-----|------|-------|
| Middle                                    | 183 | 46% | 100 | 38%  |       |
| High                                      | 68  | 17% | 45  | 17%  |       |
| <hr/>                                     |     |     |     |      |       |
| Tuberculosis infected at baseline (N=638) |     |     |     |      | <0.01 |
| No                                        | 236 | 62% | 205 | 80%  |       |
| Yes                                       | 146 | 38% | 51  | 20%  |       |
| <hr/>                                     |     |     |     |      |       |
| TB history (N=666)                        |     |     |     |      | <0.01 |
| No                                        | 386 | 96% | 265 | 100% |       |
| Yes                                       | 15  | 4%  | 0   | 0%   |       |
| <hr/>                                     |     |     |     |      |       |
| Employment (N=666)                        |     |     |     |      | 0.04  |
| No                                        | 357 | 89% | 249 | 94%  |       |
| Yes                                       | 44  | 11% | 16  | 6%   |       |
| <hr/>                                     |     |     |     |      |       |
| Being a student (N=666)                   |     |     |     |      | 0.76  |
| No                                        | 153 | 38% | 105 | 40%  |       |
| Yes                                       | 248 | 62% | 160 | 60%  |       |
| <hr/>                                     |     |     |     |      |       |
| Index-case age in years (N=666)           |     |     |     |      | <0.01 |
| 16-30                                     | 247 | 60% | 942 | 58%  |       |
| 31 to 45                                  | 82  | 20% | 439 | 27%  |       |
| 46 to 60                                  | 50  | 12% | 118 | 7%   |       |
| >60                                       | 22  | 9%  | 131 | 8%   |       |
| <hr/>                                     |     |     |     |      |       |
| Index-case sex (N=666)                    |     |     |     |      | 0.99  |
| Female                                    | 174 | 43% | 114 | 43%  |       |
| Male                                      | 227 | 57% | 151 | 57%  |       |
| <hr/>                                     |     |     |     |      |       |
| Index-case smoking status (N=638)         |     |     |     |      | 0.89  |
| None or light smoker                      | 373 | 97% | 248 | 98%  |       |
| Heavy smoker                              | 11  | 3%  | 6   | 2%   |       |
| <hr/>                                     |     |     |     |      |       |
| Index-case employment(N=665)              |     |     |     |      | 0.15  |
| No                                        | 285 | 71% | 174 | 66%  |       |
| Yes                                       | 115 | 29% | 91  | 34%  |       |
| <hr/>                                     |     |     |     |      |       |
| Index-case Marijuana use (N=662)          |     |     |     |      | 0.58  |
| No                                        | 340 | 86% | 222 | 88%  |       |
| Yes                                       | 57  | 14% | 43  | 12%  |       |
| <hr/>                                     |     |     |     |      |       |
| Index-case Cocaine (N=661)                |     |     |     |      | 0.52  |
| No                                        | 340 | 86% | 233 | 91%  |       |
| Yes                                       | 56  | 14% | 32  | 9%   |       |
| <hr/>                                     |     |     |     |      |       |
| Household incarceration (N=666)           |     |     |     |      | 0.32  |
| No                                        | 347 | 87% | 237 | 93%  |       |
| Yes                                       | 57  | 13% | 28  | 7%   |       |
| <hr/>                                     |     |     |     |      |       |
| Household education (N=666)               |     |     |     |      | 0.21  |
| Low                                       | 88  | 22% | 45  | 19%  |       |
| Middle                                    | 240 | 60% | 162 | 57%  |       |
| High                                      | 73  | 18% | 58  | 25%  |       |
| <hr/>                                     |     |     |     |      |       |
| Household district (N=666)                |     |     |     |      | <0.01 |
| Cercado de Lima                           | 30  | 7%  | 21  | 8%   |       |
| Comas                                     | 3   | 1%  | 10  | 4%   |       |
| El Agustino                               | 83  | 21% | 16  | 6%   |       |



|                      |    |     |    |     |
|----------------------|----|-----|----|-----|
| La Victoria          | 62 | 15% | 19 | 7%  |
| Los Olivos           | 51 | 13% | 28 | 11% |
| Rimac                | 7  | 2%  | 30 | 11% |
| San Martin de Porres | 81 | 20% | 87 | 33% |
| Santa Anita          | 18 | 4%  | 10 | 4%  |
| Others               | 66 | 16% | 44 | 17% |

---

<sup>a</sup> Compared the two groups used a  $\chi^2$  test

<sup>b</sup> Nutritional status was defined by the WHO body mass index z-score tables

<sup>c</sup> Socioeconomic status was defined using a principal component analysis based on housing quality,  
Abbreviation: N: number; MDR: multi-drug resistant

Table S3. Baseline characteristics of household contacts  $\leq 19$  years old and exposed to an index case with isoniazid-mono resistant tuberculosis, stratified by isoniazid prevention therapy.

| Characteristic                            | No isoniazid preventive therapy |      | Isoniazid preventive therapy |      | p-value <sup>a</sup> |
|-------------------------------------------|---------------------------------|------|------------------------------|------|----------------------|
|                                           | N                               | %    | N                            | %    |                      |
|                                           | Age in years (N=386)            |      |                              |      |                      |
| 0 to 5                                    | 56                              | 30%  | 78                           | 39%  |                      |
| 6 to 10                                   | 32                              | 17%  | 48                           | 24%  |                      |
| 11 to 15                                  | 39                              | 21%  | 46                           | 23%  |                      |
| 16 to 19                                  | 58                              | 31%  | 29                           | 14%  |                      |
| Gender (N=386)                            |                                 |      |                              |      | 0.3                  |
| Female                                    | 86                              | 46%  | 105                          | 52%  |                      |
| Male                                      | 99                              | 54%  | 96                           | 48%  |                      |
| HIV seropositive (N=378)                  |                                 |      |                              |      | NA                   |
| No                                        | 180                             | 100% | 198                          | 100% |                      |
| Yes                                       | 0                               | 0%   | 0                            | 0%   |                      |
| Diabetes Mellitus (N=382)                 |                                 |      |                              |      | 1                    |
| No                                        | 183                             | 100% | 198                          | 99%  |                      |
| Yes                                       | 0                               | 0%   | 1                            | 1%   |                      |
| BCG scars (N=386)                         |                                 |      |                              |      | 0.1                  |
| 0                                         | 36                              | 19%  | 54                           | 27%  |                      |
| 1                                         | 142                             | 77%  | 144                          | 72%  |                      |
| $\geq 2$                                  | 7                               | 4%   | 3                            | 1%   |                      |
| Smoking status (N=384)                    |                                 |      |                              |      | 0.04                 |
| Non-smoker                                | 178                             | 97%  | 200                          | 100% |                      |
| 1 cigarette per day                       | 4                               | 2%   | 0                            | 0%   |                      |
| >1 cigarette per day                      | 2                               | 1%   | 0                            | 0%   |                      |
| Alcohol use (N=383)                       |                                 |      |                              |      | 0.11                 |
| Non-drinker                               | 162                             | 89%  | 190                          | 95%  |                      |
| 0 to <3 drinks per day                    | 14                              | 8%   | 9                            | 4%   |                      |
| $\geq 3$ drinks per day                   | 6                               | 3%   | 2                            | 1%   |                      |
| Nutritional status <sup>b</sup> (N=383)   |                                 |      |                              |      | 0.69                 |
| Normal weight                             | 148                             | 81%  | 168                          | 84%  |                      |
| Underweight                               | 6                               | 3%   | 4                            | 2%   |                      |
| Overweight                                | 28                              | 15%  | 29                           | 14%  |                      |
| Use of public transportation (N=372)      |                                 |      |                              |      | 0.44                 |
| Non-user                                  | 61                              | 33%  | 74                           | 39%  |                      |
| 1 to 3 days per week                      | 70                              | 38%  | 67                           | 36%  |                      |
| 4 to 7 days per week                      | 53                              | 29%  | 47                           | 25%  |                      |
| Socioeconomic status <sup>c</sup> (N=365) |                                 |      |                              |      | 0.12                 |

|                                    |     |     |     |     |       |
|------------------------------------|-----|-----|-----|-----|-------|
| Low                                | 79  | 45% | 65  | 34% |       |
| Middle                             | 73  | 41% | 93  | 49% |       |
| High                               | 24  | 14% | 31  | 16% |       |
| <hr/>                              |     |     |     |     |       |
| TB infected at baseline (N=374)    |     |     |     |     | 0.94  |
| No                                 | 121 | 68% | 135 | 69% |       |
| Yes                                | 57  | 32% | 61  | 31% |       |
| <hr/>                              |     |     |     |     |       |
| TB history (N=386)                 |     |     |     |     | 0.45  |
| No                                 | 178 | 96% | 197 | 98% |       |
| Yes                                | 7   | 4%  | 4   | 2%  |       |
| <hr/>                              |     |     |     |     |       |
| Employment (N=386)                 |     |     |     |     | 0.09  |
| No                                 | 163 | 88% | 188 | 94% |       |
| Yes                                | 22  | 12% | 13  | 6%  |       |
| <hr/>                              |     |     |     |     |       |
| Being a student (N=386)            |     |     |     |     | 0.66  |
| No                                 | 65  | 35% | 76  | 38% |       |
| Yes                                | 120 | 65% | 126 | 62% |       |
| <hr/>                              |     |     |     |     |       |
| Index-case age in years (N=386)    |     |     |     |     | 0.28  |
| 16-30                              | 102 | 55% | 102 | 51% |       |
| 31 to 45                           | 49  | 26% | 69  | 34% |       |
| 46 to 60                           | 23  | 12% | 17  | 8%  |       |
| >60                                | 11  | 6%  | 13  | 6%  |       |
| <hr/>                              |     |     |     |     |       |
| Index-case sex (N=386)             |     |     |     |     | 0.8   |
| Female                             | 63  | 43% | 72  | 43% |       |
| Male                               | 122 | 57% | 129 | 57% |       |
| <hr/>                              |     |     |     |     |       |
| Index-case smoking status (N=377)  |     |     |     |     | 0.22  |
| None or light smoker               | 178 | 98% | 185 | 95% |       |
| Heavy smoker                       | 4   | 2%  | 10  | 5%  |       |
| <hr/>                              |     |     |     |     |       |
| Index-case drinking status (N=378) |     |     |     |     | 0.44  |
| None or light drinker              | 155 | 86% | 175 | 89% |       |
| Heavy drinker                      | 26  | 14% | 22  | 11% |       |
| <hr/>                              |     |     |     |     |       |
| Index-case employment (N=385)      |     |     |     |     | <0.01 |
| D                                  | 127 | 69% | 106 | 53% |       |
| Yes                                | 57  | 31% | 95  | 47% |       |
| <hr/>                              |     |     |     |     |       |
| Index-case Marijuana use (N=385)   |     |     |     |     | 0.05  |
| No                                 | 162 | 88% | 159 | 90% |       |
| Yes                                | 23  | 12% | 41  | 10% |       |
| <hr/>                              |     |     |     |     |       |
| Index-case Cocaine (N=386)         |     |     |     |     | 0.61  |
| No                                 | 159 | 86% | 168 | 90% |       |
| Yes                                | 26  | 14% | 33  | 10% |       |
| <hr/>                              |     |     |     |     |       |
| Household incarceration (N=386)    |     |     |     |     | 0.86  |
| No                                 | 173 | 94% | 186 | 90% |       |
| Yes                                | 12  | 6%  | 15  | 10% |       |
| <hr/>                              |     |     |     |     |       |
| Household education (N=386)        |     |     |     |     | <0.01 |
| Low                                | 50  | 27% | 27  | 68% |       |
| Middle                             | 75  | 41% | 116 | 32% |       |

| High                       | 60 | 32% | 58 | 68% |       |
|----------------------------|----|-----|----|-----|-------|
| Household district (N=386) |    |     |    |     | <0.01 |
| Cercado de lima            | 28 | 15% | 18 | 9%  |       |
| Comas                      | 12 | 6%  | 8  | 4%  |       |
| El Agustino                | 18 | 10% | 0  | 0%  |       |
| La Victoria                | 18 | 10% | 6  | 3%  |       |
| Los Olivos                 | 17 | 9%  | 22 | 11% |       |
| Rimac                      | 17 | 9%  | 43 | 21% |       |
| San Martin de Porres       | 31 | 17% | 66 | 33% |       |
| Santa Anita                | 5  | 3%  | 2  | 1%  |       |
| Others                     | 39 | 21% | 36 | 18% |       |

<sup>a</sup> Compared the two groups used a  $\chi^2$  test

<sup>b</sup> Nutritional status was defined by the WHO body mass index z-score tables

<sup>c</sup> Socioeconomic status was defined using a principal component analysis based on housing quality,  
Abbreviation: N: number; MDR: multi-drug resistant

Table S4. Effect of isoniazid prevention therapy on disease incidence of household contacts  $\leq 19$  years of age by isoniazid resistant profile pattern of tuberculosis index cases

|                              | Cases/Person-year* | Univariate analysis<br>HR (95% CI) | Multivariate**<br>HR (95% CI) |
|------------------------------|--------------------|------------------------------------|-------------------------------|
| Isoniazid prevention therapy |                    |                                    |                               |
| No                           | 108/4,250          | Ref                                | Ref                           |
| Yes                          | 38/2,583           | 0.33 (0.22-0.48)                   | 0.31 (0.2-0.47)               |
| Isoniazid resistant profile  |                    |                                    |                               |
| Sensitive                    | 108/3,849          | Ref                                | Ref                           |
| MDR                          | 27/806             | 1.17 (0.74-1.85)                   | 0.97 (0.6-1.56)               |
| Mono-isoniazid-resistant     | 11/470             | 0.82 (0.43-1.59)                   | 0.8 (0.41-1.56)               |

\*\* Numbers for univariate analyses

\*Adjusted for index case age, recreational drug use, household contact age, gender, BCG-vaccination scar, nutritional status, being a student or not, tuberculosis history, household socioeconomic status, and household residential district

Abbreviations: HR: Hazard ratio; CI: confidence interval; Ref: Reference group; MDR: multi-drug resistant.

Table S5. The effect of isoniazid prevention therapy on tuberculosis incidence in  $\leq 19$  year olds, by isoniazid resistance status of index patient, adjusted for index case age, household contact age, gender, BCG-vaccination scar, nutritional status, being a student or not, tuberculosis history, recreational use of index case, household socio-economic status, and household residential district.

A. Complete dataset

| Isoniazid prevention therapy | Isoniazid-sensitive |                 | MDR               |                  | Mono-isoniazid resistant |                |
|------------------------------|---------------------|-----------------|-------------------|------------------|--------------------------|----------------|
|                              | Cases/Person-year   | HR (95% CI)     | Cases/Person-year | HR (95% CI)      | Cases/Person-year        | HR (95% CI)    |
| No                           | 78/1,782            | Ref             | 23/474            | Ref              | 6/209                    | Ref            |
| Yes                          | 28/1,947            | 0.3 (0.18-0.48) | 3/320             | 0.19 (0.05-0.66) | 5/231                    | 0.8 (0.23-2.8) |

Likelihood ratio test for interaction term:  $<0.001$

B. Household contacts who received isoniazid prevention therapy  $\geq 3$  months

| Isoniazid prevention therapy | Isoniazid-sensitive |                  | MDR               |                  | Mono-isoniazid resistant |                  |
|------------------------------|---------------------|------------------|-------------------|------------------|--------------------------|------------------|
|                              | Cases/Person-year   | HR (95% CI)      | Cases/Person-year | HR (95% CI)      | Cases/Person-year        | HR (95% CI)      |
| No                           | 78/1,782            | Ref              | 23/474            | Ref              | 6/209                    | Ref              |
| Yes                          | 10/1133             | 0.17 (0.08-0.35) | 1/127             | 0.17 (0.02-1.34) | 3/150                    | 0.69 (0.15-3.09) |

Likelihood ratio test for interaction term:  $<0.001$

C. Household contacts who received isoniazid prevention therapy  $< 3$  months

| Isoniazid prevention therapy | Isoniazid-sensitive |                  | MDR               |                  | Mono-isoniazid resistant |                   |
|------------------------------|---------------------|------------------|-------------------|------------------|--------------------------|-------------------|
|                              | Cases/Person-year   | HR (95% CI)      | Cases/Person-year | HR (95% CI)      | Cases/Person-year        | HR (95% CI)       |
| No                           | 78/1,782            | Ref              | 23/474            | Ref              | 6/209                    | Ref               |
| Yes                          | 10/273              | 0.89 (0.43-1.83) | 1/77              | 0.31 (0.03-1.98) | 1/42                     | 1.31 (0.14-11.95) |

Likelihood ratio test for interaction term: 0.255

Table S6. The effect of isoniazid prevention therapy on tuberculosis incidence in baseline infected  $\leq 19$  year olds, by isoniazid resistance status of index patient, adjusted for index case age, household contact age, gender, BCG-vaccination scar, nutritional status, being a student or not, tuberculosis history, recreational use of index case, household socio-economic status, and household residential district.

| Isoniazid prevention therapy | Isoniazid-sensitive |                 | MDR               |                  | Mono-isoniazid resistant |                 |
|------------------------------|---------------------|-----------------|-------------------|------------------|--------------------------|-----------------|
|                              | Cases/Person-year   | HR (95% CI)     | Cases/Person-year | HR (95% CI)      | Cases/Person-year        | HR (95% CI)     |
| No                           | 58/434              | Ref             | 18/164            | Ref              | 3/66                     | Ref             |
| Yes                          | 16/504              | 0.19 (0.1-0.35) | 1/61              | 0.14 (0.02-1.07) | 4/69                     | 1.09 (0.23-5.3) |

Likelihood ratio test for interaction term: <0.001

Table S7. Isoniazid preventive therapy provided and outcomes achieved.

| Study                        | Region       | Treatment                                                         | Treatment group<br>(case/total N) | Control group<br>(case/total N) | Follow up time       |
|------------------------------|--------------|-------------------------------------------------------------------|-----------------------------------|---------------------------------|----------------------|
| Kritski Brazil 1996 (13)     | Brazil       | High dose                                                         | 2/45                              | 145                             | 10,604-person-months |
| Schaaf et al. 2002 (14)      | South Africa | Various, all have isoniazid                                       | 2/41                              | 13/64                           | 30 months            |
| Attamna et al. 2009 (15)     | Israel       | Isoniazid                                                         | 0/71                              | 0/387                           | 2,666 person years   |
| Tochon et al. 2011(16)       | France       | Isoniazid and rifampin up to 3 month                              | 1/6                               | NA                              | NA                   |
| Denholm et al. 2012 (17)     | Australia    | Various (all were not under regular isoniazid preventive therapy) | 0/11                              | 2/38                            | Median 54 months     |
| Seddon et al. 2013 (18)      | South Africa | High dose isoniazid, ethionamide and ofloxacin                    | 6/187                             | NA                              | 219 patient-years    |
| Garcia-Prat et al. 2014 (19) | South Africa | High dose isoniazid, ethionamide and ofloxacin                    | 0/21                              | 0/10                            | 1 year               |
| Wu et al. 2018 (20)          | China        | Isoniazid                                                         | 2/5                               | 4/16                            | 6 months             |



## Reference

1. Frothingham R, Meeker-O'Connell WA. Genetic diversity in the Mycobacterium tuberculosis complex based on variable numbers of tandem DNA repeats. *Microbiology* 1998; **144**: 1189-96.
2. [https://support.illumina.com/content/dam/illumina-support/documents/documentation/system\\_documentation/hiseq4000/hiseq-4000-system-guide-15066496-04.pdf](https://support.illumina.com/content/dam/illumina-support/documents/documentation/system_documentation/hiseq4000/hiseq-4000-system-guide-15066496-04.pdf) (accessed April 1, 2019)
3. Li H. Toward better understanding of artifacts in variant calling from high-coverage samples. *Bioinformatics* 2014; **30**: 2843-51.
4. Li H, Handsaker B, Fenell T, et al. The Sequence Alignment/Map format and SAMtools. *Bioinformatics* 2009 **25**: 2078-9.
5. Walker BJ, Abeel T, Shea T, et.al. Pilon: an integrated tool for comprehensive microbial variant detection and genome assembly improvement. *PLoS One* 2014 **9**(11):e112963
6. Ministerio de Salud. Norma técnica de salud para el control de la tuberculosis. Lima, Peru, 2006. Available from: <ftp://ftp2.minsa.gob.pe/descargas/dgsp/ESN-tuberculosis/normaspublicaciones/NTStuberculosis,C.pdf> (accessed October 10, 2018).
7. World Health Organization. Child growth standards. 2011 Available from: <http://www.who.int/childgrowth/software/en/>. Accessed 14 December 2015.
8. Graham SM, Ahmed T, Amanullah F, et al. Evaluation of tuberculosis diagnostics in children: Proposed clinical case definitions for classification of intrathoracic tuberculosis disease. Consensus from an expert panel. *J Infect Dis* 2012 **205**(Suppl 2): S199-208.
9. O'Quigley J, Stare J. Proportional hazards models with frailties and random effects. *Stat Med* 2002; **21**(21): 3219-33.
10. International Union Against Tuberculosis Committee on Prophylaxis. Efficacy of various durations of isoniazid preventive therapy for tuberculosis: five years of follow-up in the UAT trial. *Bull World Health Organ* 1982; **60**: 555-64.
11. Grandjean L, Gilman RH, Martin L et al. Transmission of Multidrug-Resistant and Drug-Susceptible Tuberculosis within Households: A Prospective Cohort Study. *PLoS Med* 2015; **12**(6): e1001843
12. Caviedes L, Lee TS, Gilman RH, Sheen P, et al. Rapid, efficient detection and drug susceptibility testing of Mycobacterium tuberculosis in sputum by microscopic observation of broth cultures. The Tuberculosis Working Group in Peru. *J Clin Microbiol* 2000; **38**: 12-1208.
13. Kritski AL, Marques MJ, Rabahi MF, et al. Transmission of tuberculosis to close contacts of patients with multidrug-resistant tuberculosis. *Am J Respir Crit Care Med* 1996; **153**(1): 331-5.
14. Schaaf HS, Gie RP, Kennedy M, Beyers N, Hesselning PB, Donald PR. Evaluation of young children in contact with adult multidrug-resistant pulmonary tuberculosis: a 30-month follow-up. *Pediatrics* 2002; **109**: 765-71.

15. Attamna A, Chemtob D, Attamna S, et al. Risk of tuberculosis in close contacts of patients with multidrug resistant tuberculosis: a nationwide cohort. *Thorax* 2009; 64: 271.
16. Tochon M, Bosdure E, Salles M, et al. Management of young children in contact with an adult with drug-resistant tuberculosis, France, 2004-2008. *Int J Tuberc Lung Dis* 2011; 15: 326-30.
17. Denholm JT, Leslie DE, Jenkin GA, et al. Long-term follow-up of contacts exposed to multidrug-resistant tuberculosis in Victoria, Australia, 1995 -2010. *Int J Tuberc Lung Dis* 2012; 16: 1320-5.
18. Seddon JA, Hesselning AC, Finlayson H, et al. Preventive therapy for child contacts of multidrug-resistant tuberculosis: a prospective cohort study. *Clin Infect Dis* 2013; 57: 1676-84.
19. Garcia-Prats AJ, Zimri K, Mramba Z, Schaaf HS, Hesselning AC. Children exposed to multidrug-resistant tuberculosis at a home-based day care centre: a contact investigation. *Int J Tuberc Lung Dis* 2014; 18: 1292-8.
20. Wu X, Pang Y, Song Y, et al. Implications of a school outbreak of multidrug-resistant tuberculosis in Northern China. *Epidemiol Infect* 2018; 145(5):584-8.
